# Supplementary material for: Enhancing Charge Transfer and Photoelectric Characteristics for Organic Solar Cells
Source: Hindawi journal article supplement (doi:10.1155/2020/5641063), 2020-02-26
Supplement: f1 [file 5641063.f1.docx]

**Supporting materials**

**Table caption:**

**Table S1.** Experimental absorption peak, calculated absorption peaks with corresponding oscillator strengths of the dye ZHG5 in dichloromethane by using different functionals via TDDFT/6-31G(d) method (nm).

**Table S2.** The calculated transition properties of ZHG5, ZHG6 and ZHG7 in THF via TD-DFT// Cam-B3LYP /6-31G(d).

**Table S3.** Energy levels and energy gaps of the dyes in different external electric field (×10-4 a.u.), in which H and L represent HOMO and LUMO, respectively (eV).

**Table S4.** Calculated transition energies and oscillator strengths of ZHG5, ZHG6 and ZHG7 in electric field (×10-4 a.u.), in which H and L represent HOMO and LUMO, respectively.

**Table S5.** The calculated transition properties of ZHG5/GR, ZHG6/GR and ZHG7/GR in THF via TD-DFT// Cam-B3LYP /6-31G(d).

**Table S6.** The calculated transition properties of the nine designed dyes and ZHG5 in solvent (eV).

**Table S7.** The calculated transition properties of the nine designed molecules in solvent (eV).

**Table S1.** Experimental absorption peak, calculated absorption peaks with corresponding oscillator strengths of the dye ZHG5 in dichloromethane by using different functionals via TDDFT/6-31G(d) method (nm).

|  | B3LYP | Cam-B3LYP | PBEPBE | LC-ωPBE | ωb97x | MPW1PW91 | Exp.a | |
| --- | --- | --- | --- | --- | --- | --- | --- | --- |
|  | 701.56 | 452.36 | 1142.76 | 400.25 | 411.85 | 639.86 | 471 |

a Maximum absorption peak in experiment.

**Table S2.** The calculated transition properties of ZHG5, ZHG6 and ZHG7 in THF via TD-DFT// Cam-B3LYP /6-31G(d).

| Dyes | State | *E* (eV) | (nm) 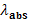 | Contribution MO | Strength *f* | Experiment (nm) |
| --- | --- | --- | --- | --- | --- | --- |
| ZHG5 | S4 | 3.75 | 330.52 | (42.6%) H-3→L | 0.237 | 471 |
| S5 | 3.78 | 327.98 | (19.4%) H-1→L+1 | 0.049 |
| S6 | 3.83 | 323.77 | (53.9%) H→L+3 | 0.171 |
| ZHG6 | S4 | 3.75 | 330.51 | (39.3%) H-4→L | 0.261 | 466 |
| S5 | 3.77 | 328.72 | (39.4%) H→L+3 | 0.192 |
| S6 | 3.80 | 326.49 | (18.8%) H→L+3 | 0.129 |
| ZHG7 | S4 | 3.75 | 330.61 | (18.6%) H→L+3 | 0.426 | 472 |
| S5 | 3.76 | 330.07 | (19.8%) H→L+3 | 0.121 |
| S6 | 3.79 | 326.96 | (17.5%) H→L+1 | 0.085 |

**Table S3.** Energy levels and energy gaps of the dyes in different external electric field (×10-4 a.u.), in which H and L represent HOMO and LUMO, respectively (eV).

| Dye | Field | HOMO | LUMO | △H-L |
| --- | --- | --- | --- | --- |
| ZHG5 | 0 | -4.94 | -2.89 | 2.05 |
| 5 | -4.83 | -2.91 | 1.92 |
| 10 | -4.79 | -3.07 | 1.72 |
| 15 | -4.75 | -3.23 | 1.52 |
| 20 | -5.86 | -2.48 | 3.38 |
| 25 | -5.78 | -2.66 | 3.12 |
| 30 | -5.68 | -2.85 | 2.83 |
| ZHG6 | 0 | -4.95 | -2.89 | 2.06 |
| 5 | -6.05 | -1.96 | 4.09 |
| 10 | -4.81 | -3.82 | 1.69 |
| 15 | -4.75 | -3.23 | 1.52 |
| 20 | -4.69 | -3.39 | 1.30 |
| 25 | -4.52 | -3.63 | 0.89 |
| 30 | -4.41 | -3.77 | 0.64 |
| ZHG7 | 0 | -4.96 | -2.89 | 2.07 |
| 5 | -4.88 | -2.98 | 1.90 |
| 10 | -4.79 | -3.07 | 1.72 |
| 15 | -4.79 | -3.45 | 1.34 |
| 20 | -4.62 | -3.69 | 0.93 |
| 25 | -5.70 | 3.06 | 2.64 |
| 30 | -4.32 | -4.09 | 0.23 |

**Table S4.** Calculated transition energies and oscillator strengths of ZHG5, ZHG6 and ZHG7 in electric field (×10-4 a.u.), in which H and L represent HOMO and LUMO, respectively.

| Dye | Field | State | E (eV) | (nm) | CI main | *f* |
| --- | --- | --- | --- | --- | --- | --- |
| ZHG5 | 0 | 1 | 2.74 | 452.36 | (51.7%) H→L | 1.45 |
| 5 | 1 | 2.73 | 454.07 | (64.8%)H→L | 1.02 |
| 10 | 1 | 2.61 | 475.89 | (69.4%)H→L | 0.89 |
| 15 | 1 | 2.46 | 504.12 | (72.7%)H→L | 0.78 |
| 20 | 1 | 2.29 | 541.04 | (74.9%)H→L | 0.68 |
| 25 | 1 | 2.11 | 588.78 | (76.6%)H→L | 0.62 |
| 30 | 1 | 1.90 | 651.61 | (78.6%)H→L | 0.56 |
| ZHG6 | 0 | 1 | 2.75 | 451.50 | (49.6%) H→L | 1.50 |
| 5 | 1 | 2.74 | 452.34 | (60.5%)H→L | 1.07 |
| 10 | 1 | 2.62 | 473.74 | (62.3%)H→L | 0.93 |
| 15 | 1 | 2.46 | 503.06 | (62.0%)H→L | 0.79 |
| 20 | 1 | 2.28 | 542.70 | (62.3%)H→L | 0.66 |
| 25 | 1 | 2.07 | 598.66 | (67.3%)H→L | 0.53 |
| 30 | 1 | 1.80 | 688.92 | (78.9%)H→L | 0.40 |
| ZHG7 | 0 | 1 | 2.74 | 452.00 | (49.0%) H→L | 1.52 |
| 5 | 1 | 2.25 | 550.48 | (30.0%)H-2→L | 0.64 |
| 10 | 1 | 2.55 | 486.76 | (53.9%)H→L | 0.99 |
| 15 | 1 | 2.42 | 513.27 | (44.7%)H→L | 0.83 |
| 20 | 1 | 2.28 | 542.75 | (28.7%)H→L | 0.61 |
| 25 | 1 | 2.04 | 609.23 | (47.3%)H-1→L | 0.39 |
| 30 | 1 | 1.66 | 748.46 | (83.2%)H→L | 0.07 |

**Table S5.** The calculated transition properties of ZHG5/GR, ZHG6/GR and ZHG7/GR in THF via TD-DFT// Cam-B3LYP /6-31G(d).

| Dyes | State | *E* (eV) | (nm) 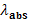 | Contribution MO | Strength *f* |
| --- | --- | --- | --- | --- | --- |
| ZHG5/GR | S1 | 2.53 | 489.36 | (35.8%) H→L+1 | 0.006 |
| S2 | 2.63 | 470.85 | (34.7%) H-3→L | 2.248 |
| S3 | 2.72 | 455.96 | (28.9%) H →L+2 | 0.217 |
| ZHG6/GR | S1 | 2.53 | 489.24 | (35.7%) H→L+1 | 0.005 |
| S2 | 2.63 | 470.90 | (29.4%) H-2→L | 2.295 |
| S3 | 2.72 | 455.78 | (28.9%) H→L+2 | 0.219 |
| ZHG7/GR | S1 | 2.53 | 489.26 | (35.8%) H→L+1 | 0.005 |
| S2 | 2.64 | 469.95 | (28.1%) H-2→L | 2.288 |
| S3 | 2.72 | 455.63 | (29.3%) H→L+2 | 0.261 |

**Table S6.** Energy levels and energy gaps of the designed dyes and ZHG5/TiO2 in solvent (eV).

|  | H | L |  |
| --- | --- | --- | --- |
| ZHG5-1 | -4.88 | -2.92 | 1.96 |
| ZHG5-2 | -4.90 | -2.92 | 1.98 |
| ZHG5-3 | -4.91 | -3.40 | 1.51 |
| ZHG5-4 | -4.78 | -2.90 | 1.88 |
| ZHG5-5 | -4.80 | -2.91 | 1.89 |
| ZHG5-6 | -4.81 | -3.39 | 1.42 |
| ZHG5-7 | -4.86 | -2.93 | 1.93 |
| ZHG5-8 | -4.87 | -2.92 | 1.95 |
| ZHG5-9 | -4.89 | -3.40 | 1.49 |
| ZHG5/TiO2 | -4.97 | -3.34 | 1.63 |
| ZHG5-1/TiO2 | -4.88 | -3.40 | 1.48 |
| ZHG5-2/TiO2 | -4.91 | -3.34 | 1.98 |
| ZHG5-3/TiO2 | -4.93 | -3.62 | 1.31 |
| ZHG5-4/TiO2 | -4.80 | -3.38 | 1.42 |
| ZHG5-5/TiO2 | -4.80 | -3.32 | 1.48 |
| ZHG5-6/TiO2 | -4.83 | -3.61 | 1.22 |
| ZHG5-7/TiO2 | -4.88 | -3.38 | 1.50 |
| ZHG5-8/TiO2 | -4.88 | -3.33 | 1.55 |
| ZHG5-9/TiO2 | -4.91 | -3.62 | 1.29 |

**Table S7.** The calculated transition properties of the nine designed molecules in solvent (eV).

| Dyes | State | *E* (eV) | (nm) 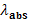 | CI coefficients | Strength  *f* |
| --- | --- | --- | --- | --- | --- |
| ZHG5-1 | S1 | 2.76 | 448.69 | (42.1%) H→L | 1.0914 |
| S4 | 3.72 | 333.29 | (23.9%) H-3→L | 0.1736 |
| S6 | 3.83 | 323.65 | (44.1%) H→L+3 | 0.1967 |
| ZHG5-2 | S1 | 2.75 | 450.21 | (52.0%) H→L | 1.3394 |
| S2 | 3.27 | 378.91 | (30.4%) H-1→L | 0.2592 |
| S6 | 3.85 | 321.85 | (54.9%) H→L+3 | 0.2066 |
| ZHG5-3 | S1 | 2.46 | 504.56 | (47.4%) H→L | 1.3039 |
| S4 | 3.57 | 346.95 | (32.6%) H-3→L | 0.2153 |
| S6 | 3.81 | 324.87 | (38.9%) H→L+4 | 0.1479 |
| ZHG5-4 | S1 | 2.75 | 450.90 | (42.7%) H→L | 1.0613 |
| S5 | 3.75 | 330.69 | (22.7%) H-4→L | 0.1560 |
| S6 | 3.82 | 324.29 | (37.1%) H→L+3 | 0.1627 |
| ZHG5-5 | S1 | 2.73 | 454.97 | (53.6%) H→L | 1.2769 |
| S2 | 3.23 | 384.07 | (27.8%) H-3→L | 0.3176 |
| S4 | 3.74 | 331.37 | (37.0%) H-4→L | 0.1807 |
| ZHG5-6 | S1 | 2.43 | 510.60 | (49.6%) H→L | 1.2496 |
| S2 | 2.91 | 426.07 | (35.9%) H→L | 0.2015 |
| S4 | 3.57 | 347.46 | (61.4%) H-4→L | 0.2115 |
| ZHG5-7 | S1 | 2.75 | 451.36 | (42.7%) H→L | 1.0854 |
| S4 | 3.71 | 333.81 | (24.4%) H→L | 0.1796 |
| S6 | 3.80 | 326.11 | (43.6%) H→L+3 | 0.1750 |
| ZHG5-8 | S1 | 2.74 | 452.44 | (53.9%) H→L | 1.3241 |
| S2 | 3.26 | 380.63 | (31.3%) H-1→L | 0.2779 |
| S6 | 3.83 | 323.99 | (54.9%) H→L+3 | 0.1921 |
| ZHG5-9 | S1 | 2.44 | 508.95 | (53.8%) H→L | 1.2939 |
| S2 | 2.95 | 420.97 | (34.6%) H→L | 0.1590 |
| S3 | 3.56 | 348.50 | (32.0%) H-3→L | 0.2153 |

**Figure caption:**

**Figure S1.** The frontier molecular orbits and charge density difference (right) between the excited and ground states diagrams of ZHG5/GR, ZHG6/GR and ZHG7/GR.

**Figure S2.** FMO diagrams of the designed molecules.

**Figure S3.** Simulated UV-Vis spectra of ZHG5 and nine designed moleculesinsolvent.

a: ZHG5, ZHG5-1, ZHG5-2 and ZHG5-3;

b: ZHG5, ZHG5-4, ZHG5-5 and ZHG5-6;

c: ZHG5, ZHG5-7, ZHG5-8 and ZHG5-9.

| ZHG5  /GR | 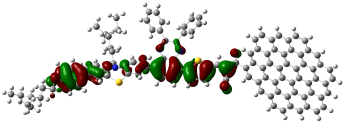  HOMO-3 | 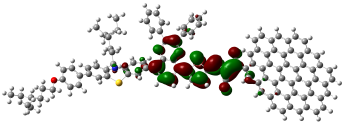  LUMO | 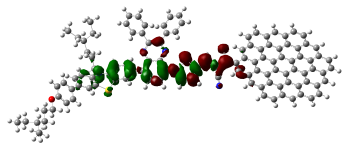  S2 |
| --- | --- | --- | --- |
| ZHG6  /GR | 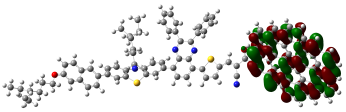  HOMO-2 | 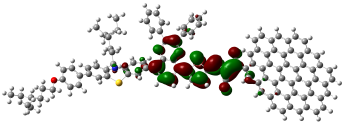  LUMO | 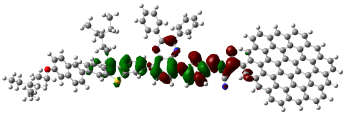  S2 |
| ZHG7  /GR | 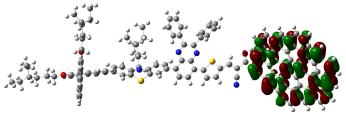  HOMO-2 | 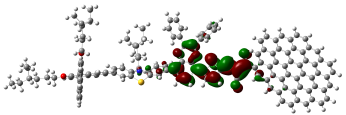  LUMO | 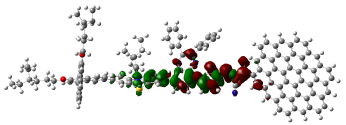  S2 |

**Figure S1.** The frontier molecular orbits and charge density difference (right) between the excited and ground states diagrams of ZHG5/GR, ZHG6/GR and ZHG7/GR.

|  | HOMO | LUMO |
| --- | --- | --- |
| ZHG5-1 | 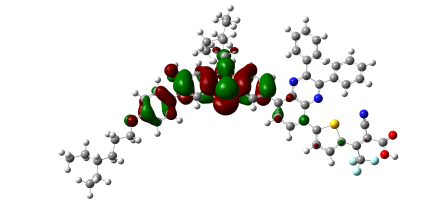 | 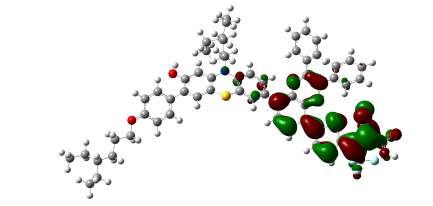 |
| ZHG5-2 | 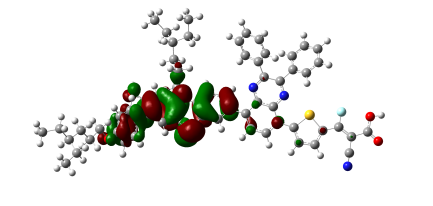 | 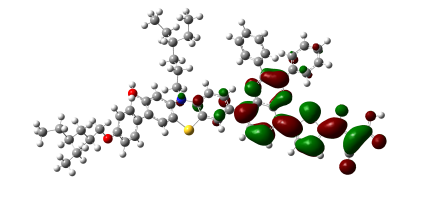 |
| ZHG5-3 | 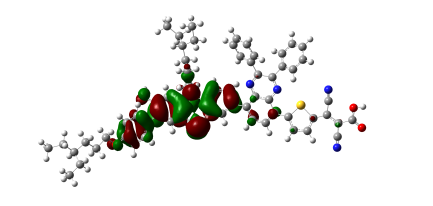 | 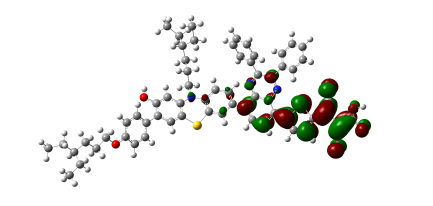 |
| ZHG5-4 | 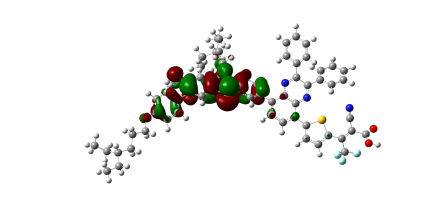 | 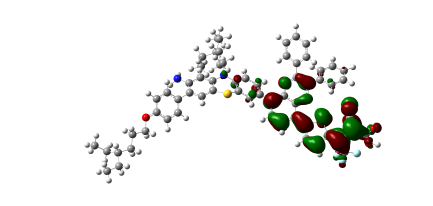 |
| ZHG5-5 | 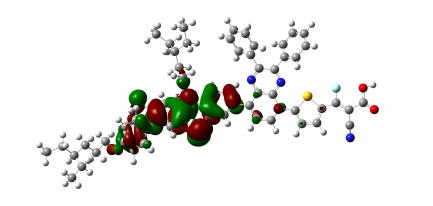 | 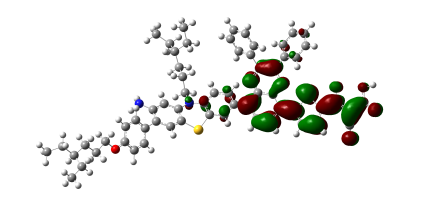 |
| ZHG5-6 | 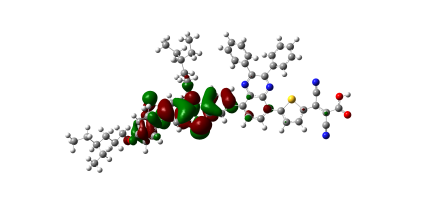 | 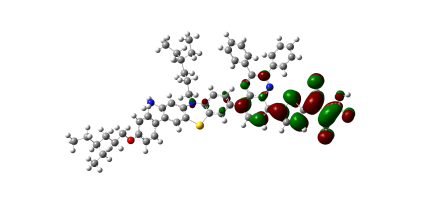 |
| ZHG5-7 | 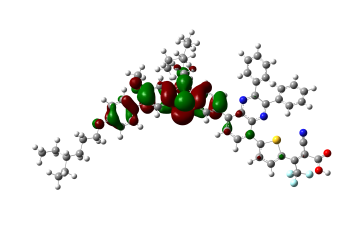 | 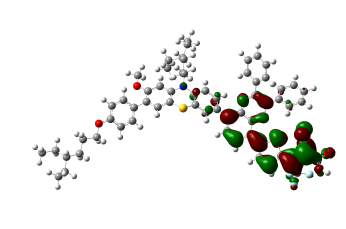 |
| ZHG5-8 | 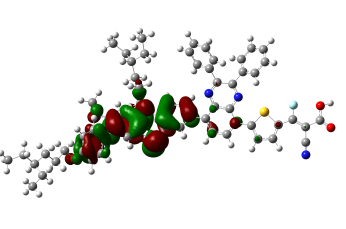 | 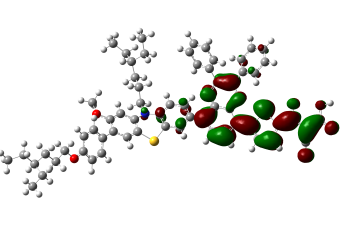 |
| ZHG5-9 | 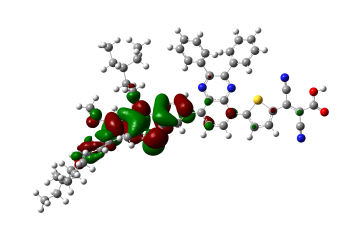 | 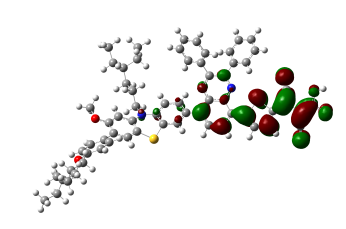 |

**Figure S2.** FMO diagrams of the designed molecules.

| 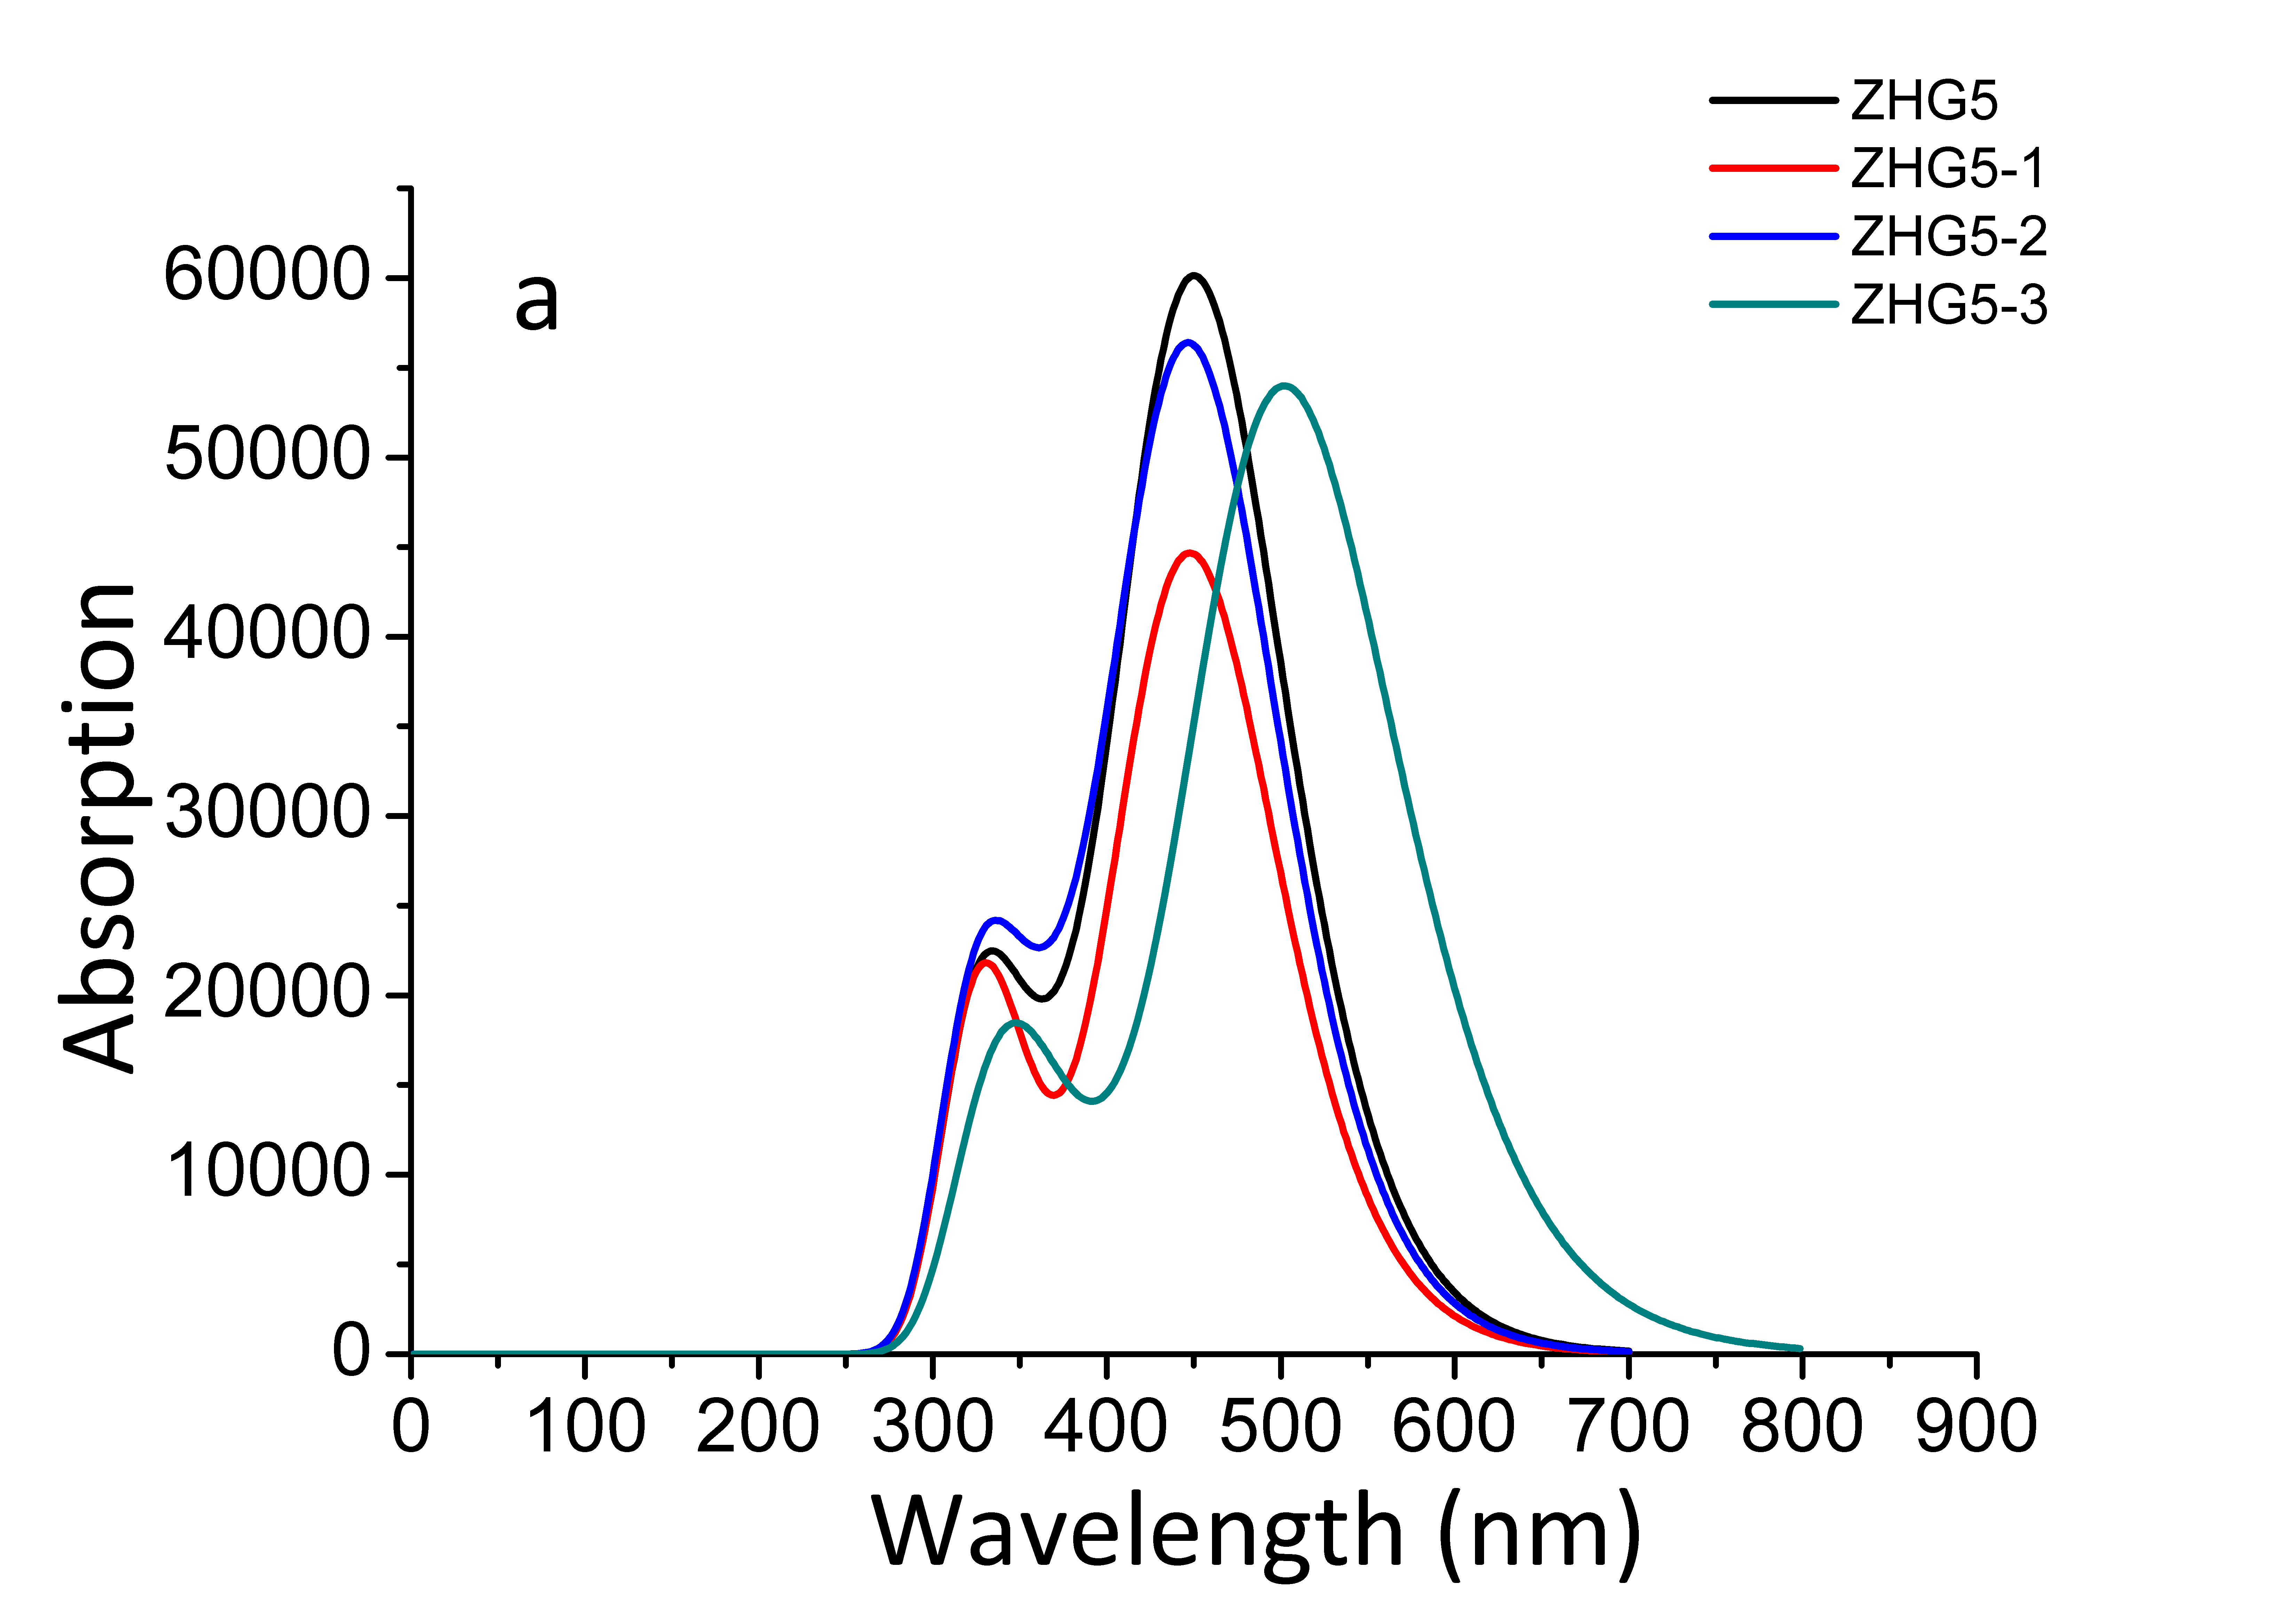 |
| --- |
| 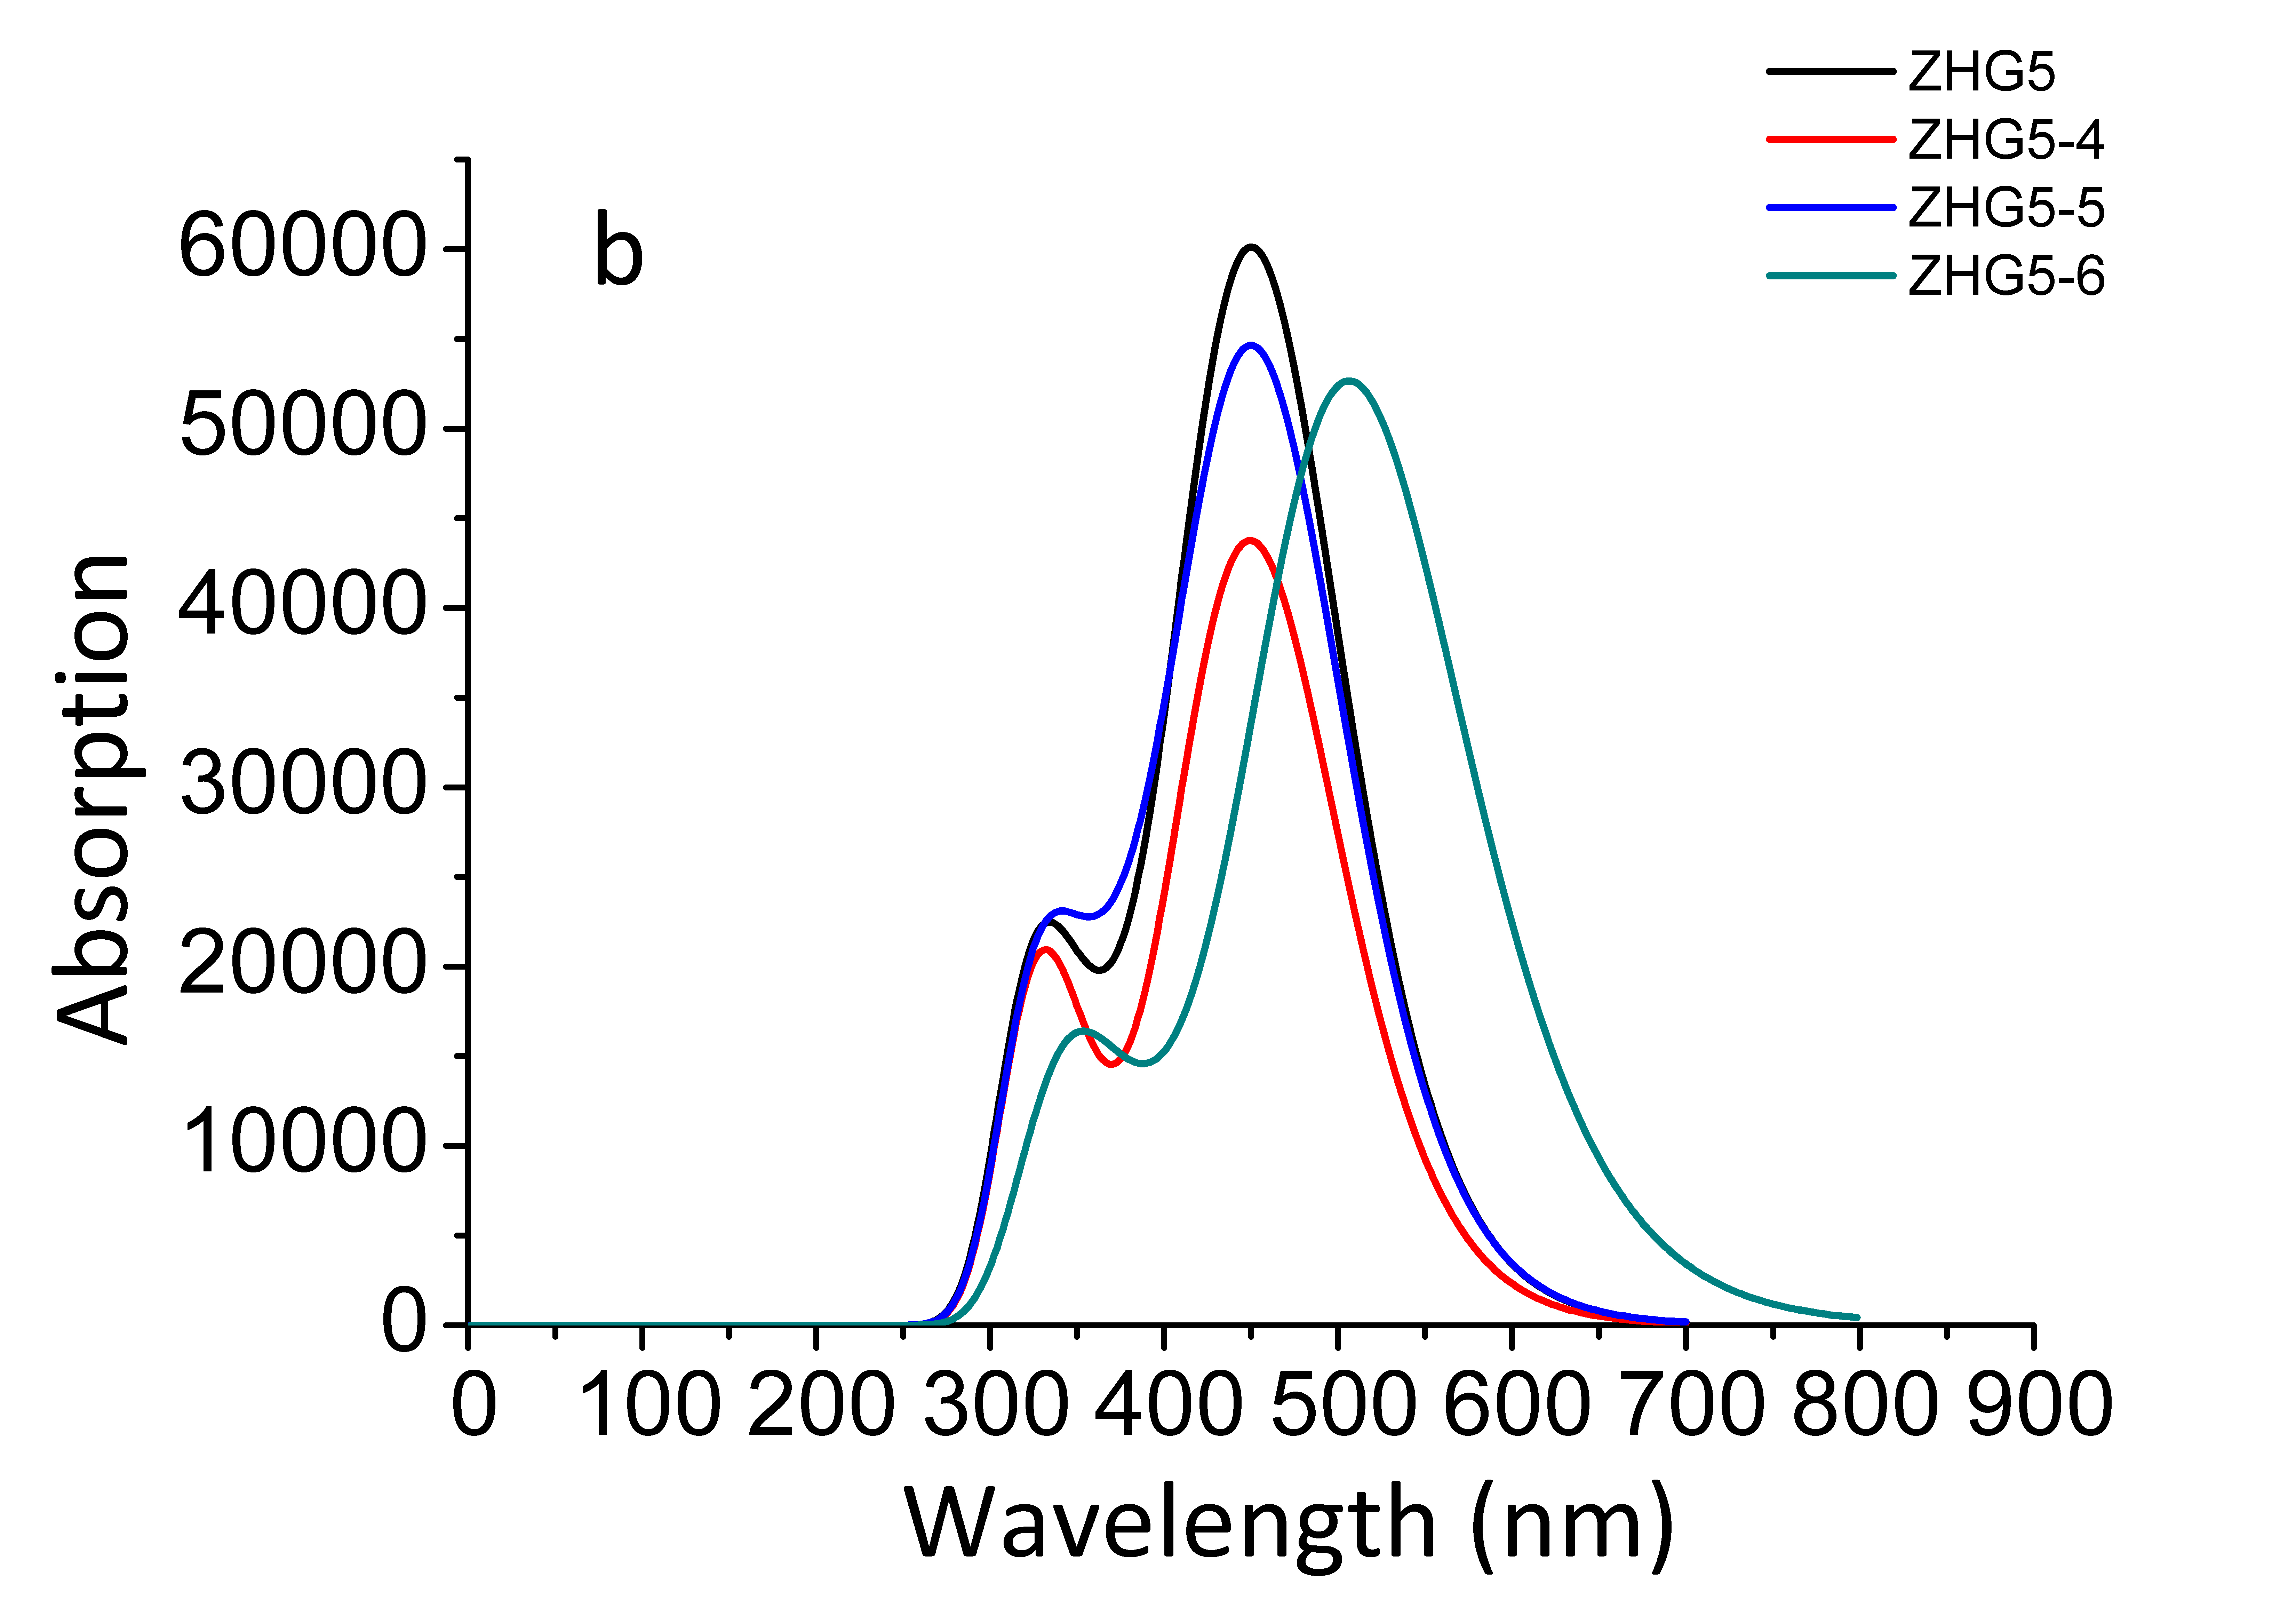 |
| 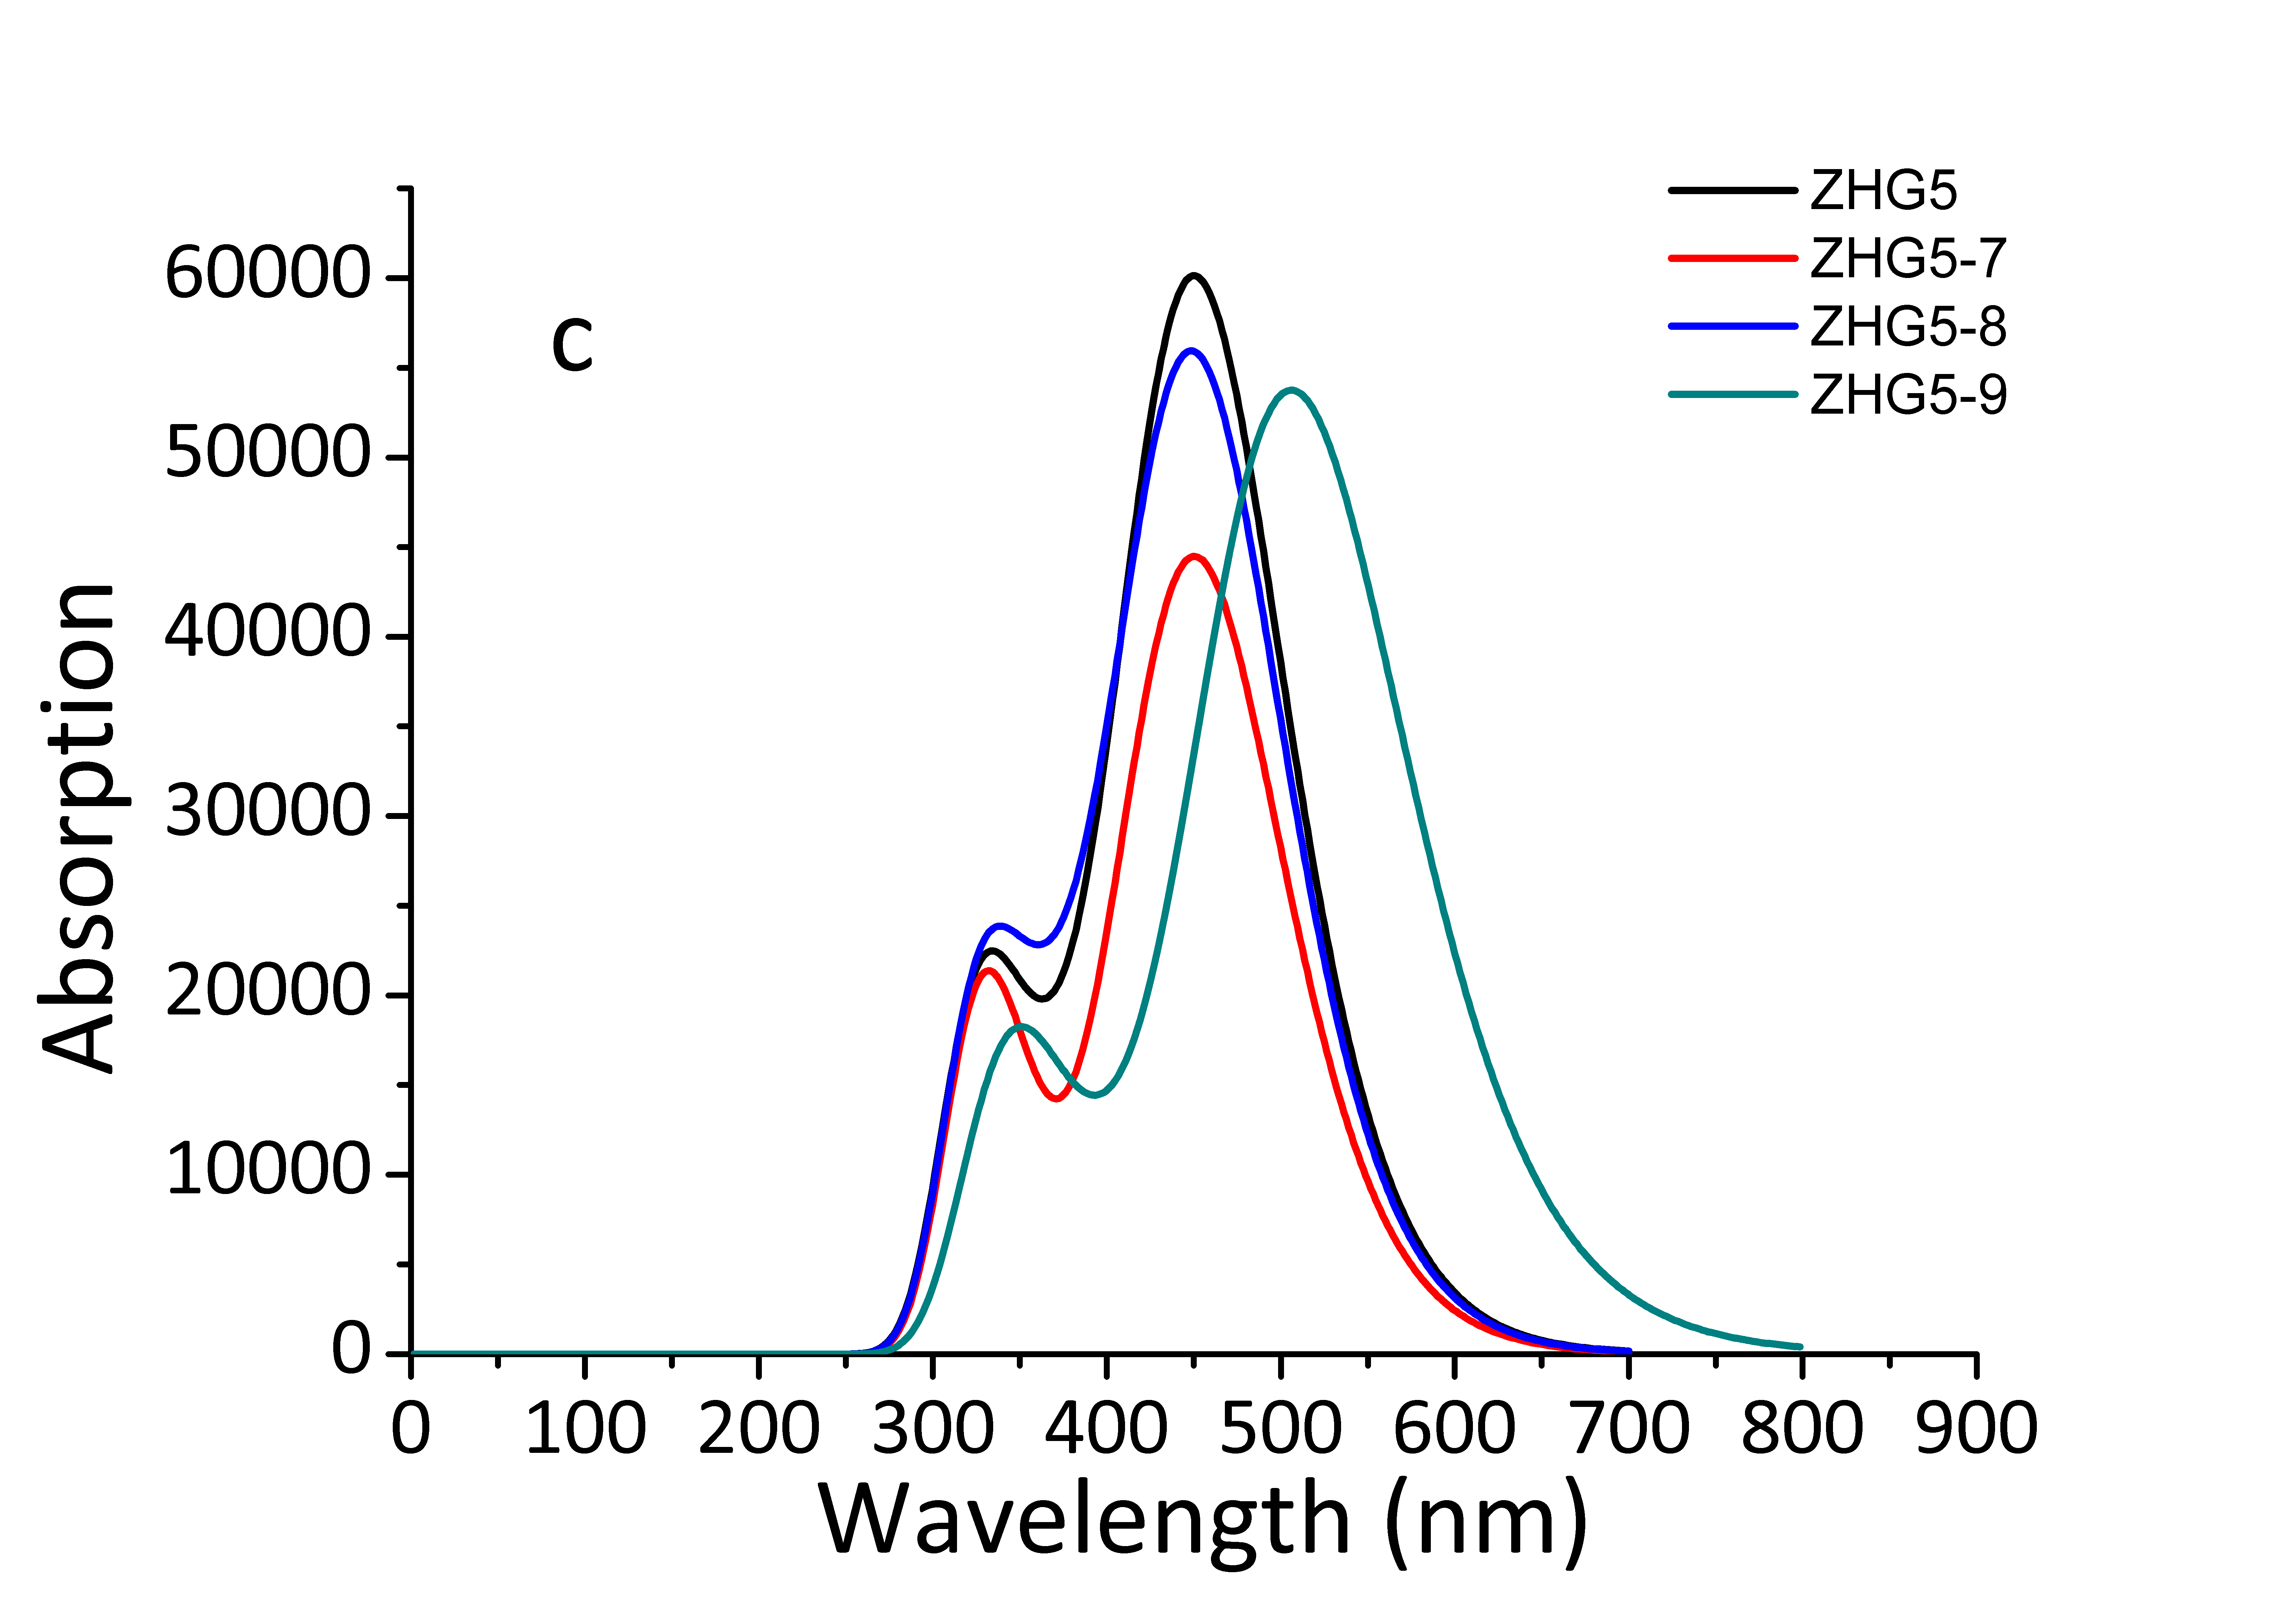 |

**Figure S3.** Simulated UV-Vis spectra of ZHG5 and nine designed moleculesinsolvent.

a: ZHG5, ZHG5-1, ZHG5-2 and ZHG5-3;

b: ZHG5, ZHG5-4, ZHG5-5 and ZHG5-6;

c: ZHG5, ZHG5-7, ZHG5-8 and ZHG5-9.
